# Supplementary material for: Achieving over 90 % initial Coulombic efficiency and highly stable Li storage in SnO2 by constructing interfacial oxygen redistribution in multilayers
Source: Research Square preprint supplement (doi:10.21203/rs.3.rs-243641/v1), 2021-03-11
Supplement: Supplementary file 1 [file 6d607f89a825c3aebb98db9a.pdf]

# Supplementary Information

## Achieving over 90 % initial Coulombic efficiency and highly stable Li storage in SnO<sub>2</sub> by constructing interfacial oxygen redistribution in multilayers

Xuexia Lan<sup>†a</sup>, Jie Cui<sup>†b</sup>, Xiaofeng Zhang<sup>†c</sup>, Renzong Hu<sup>\*a</sup>, Liang Tan<sup>a</sup>, Jiayi He<sup>a</sup>, Houpo Zhang<sup>a</sup>, XingYu Xiong<sup>a</sup>, Xianfeng Yang<sup>b</sup>, Shunqing Wu<sup>\*c</sup>, and Min Zhu<sup>\*a</sup>

<sup>a</sup> School of Materials Science and Engineering, Guangdong Provincial Key Laboratory of Advanced Energy Storage Materials, South China University of Technology, Guangzhou, 510640, China

<sup>b</sup> Analytical and Testing Center, South China University of Technology, Guangzhou, 510640, China

<sup>c</sup> Department of Physics, OSED, Key Laboratory of Low Dimensional Condensed Matter Physics (Department of Education of Fujian Province), Jiujiang Research Institute, Xiamen University, Xiamen, 361005, China

<sup>†</sup> These authors contributed equally.

\* Corresponding Author.

E-mail addresses: [msrenzonghu@scut.edu.cn](mailto:msrenzonghu@scut.edu.cn) (Renzong Hu)

[wsq@xmu.edu.cn](mailto:wsq@xmu.edu.cn) (Shunqing Wu)

[memzhu@scut.edu.cn](mailto:memzhu@scut.edu.cn) (Min Zhu)

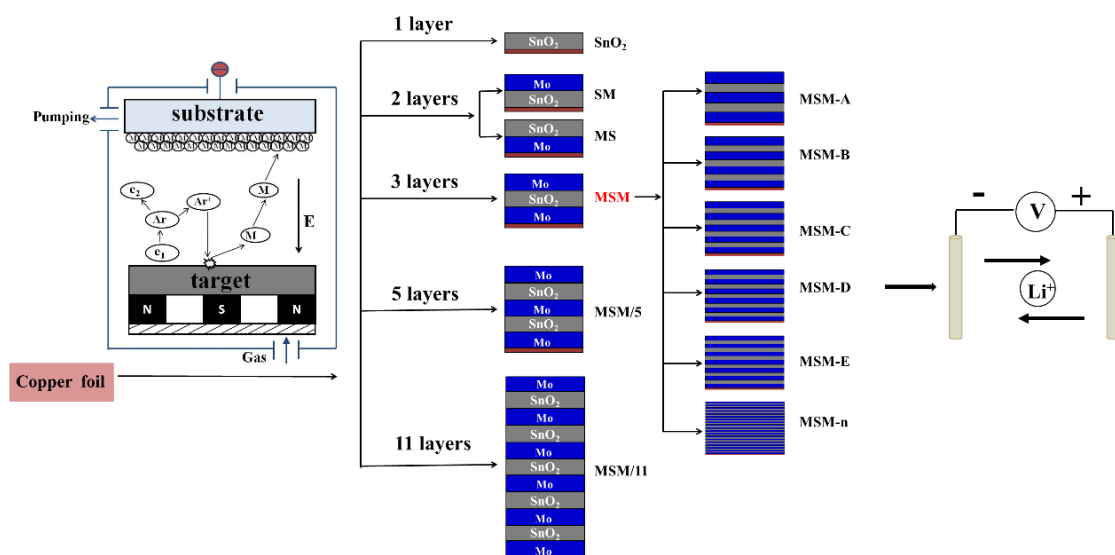

**Figure S1.** Schematic illustration of the SnO<sub>2</sub>-Mo multilayered electrodes preparation procedures. (a) Depositing the SnO<sub>2</sub>-Mo multilayers on the copper foil current collector. (b) Assembling Li-ion cells to evaluate the electrochemical performance of the SnO<sub>2</sub>-Mo multilayered electrodes.

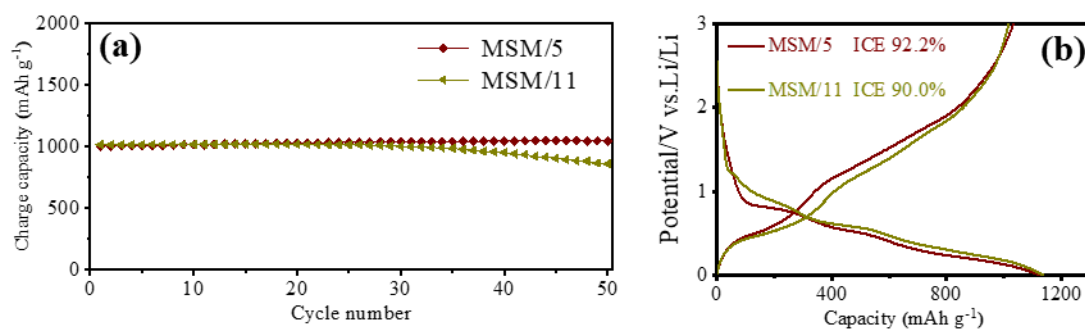

**Figure S2.** Cycling performance and discharge/charge profiles of the MSM/5 and MSM/11 electrodes.

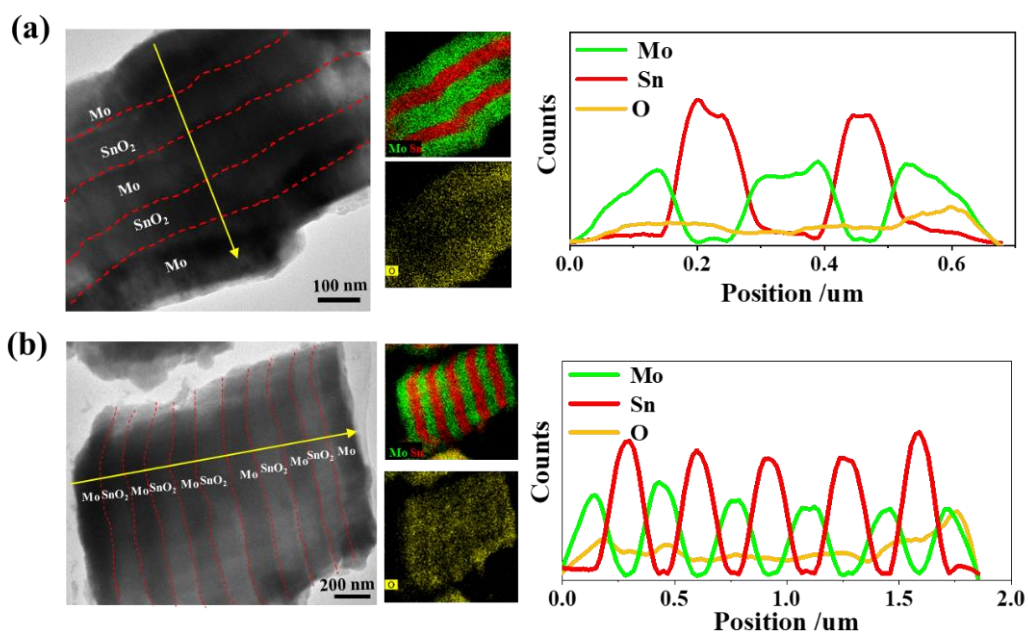

**Figure S3.** TEM images of cross-sectional morphology and EDS images for MSM/5 (a) and MSM/11 (b) electrodes.

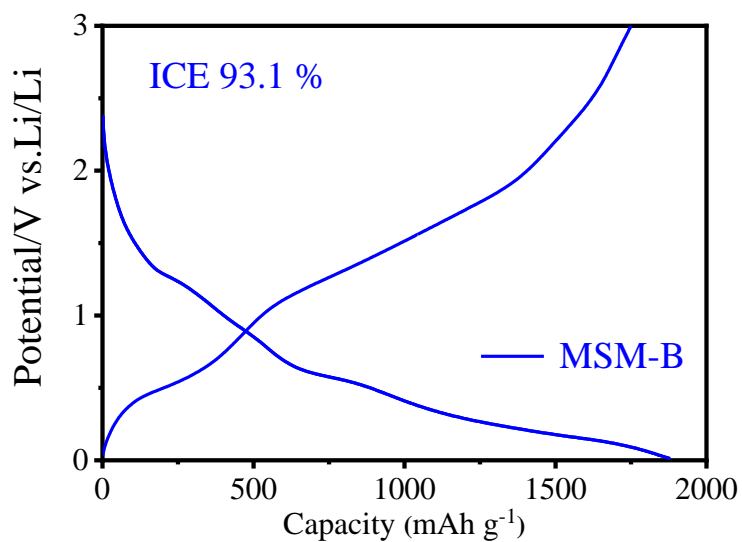

**Figure S4.** Discharge/charge profiles of the MSM-B electrode.

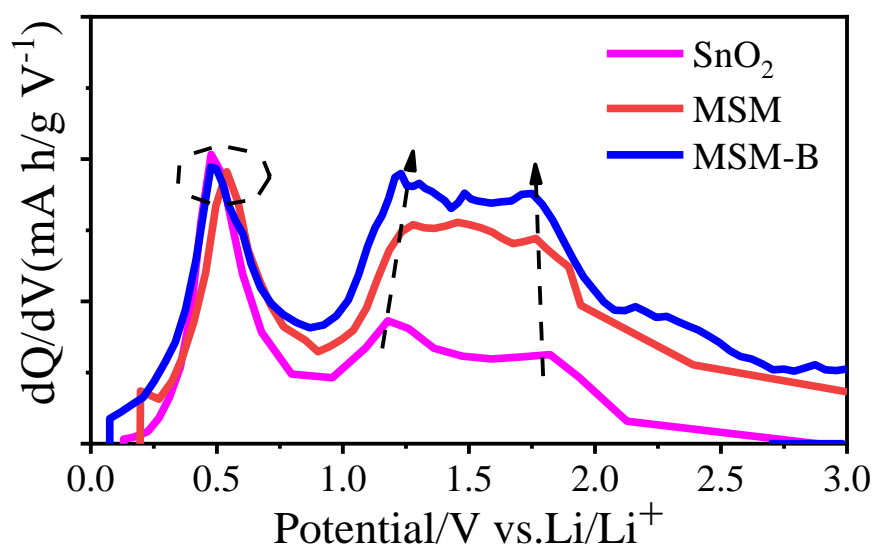

**Figure S5.** Differential charge capacity vs. voltage curve of the SnO<sub>2</sub>, MSM and MSM-B electrodes at the 1st cycle.

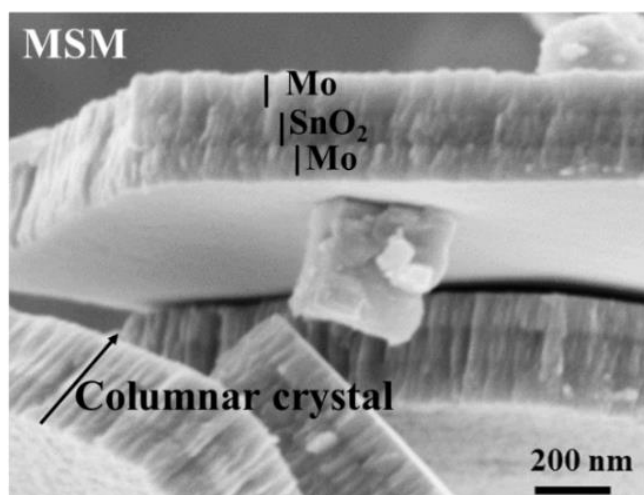

**Figure S6.** SEM image of cross-sectional morphology for the MSM electrode.

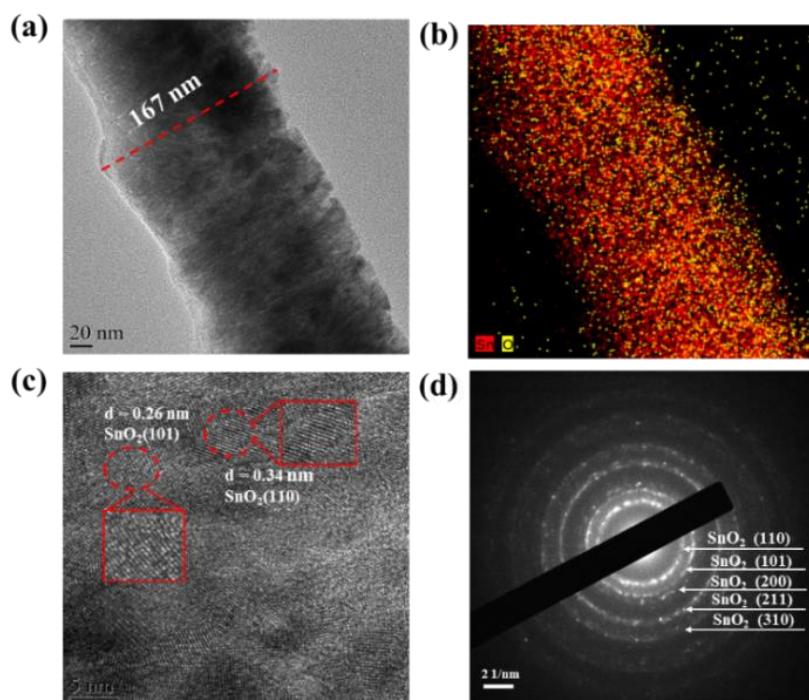

1  
2 **Figure S7.** TEM images of cross-sectional morphology and phase observation for the  
3 SnO<sub>2</sub> electrode. (a) Typical TEM image of cross-sectional morphology. (b) EDS  
4 mapping images with Sn and O elements. (c) HRTEM image. (d) SAED image.

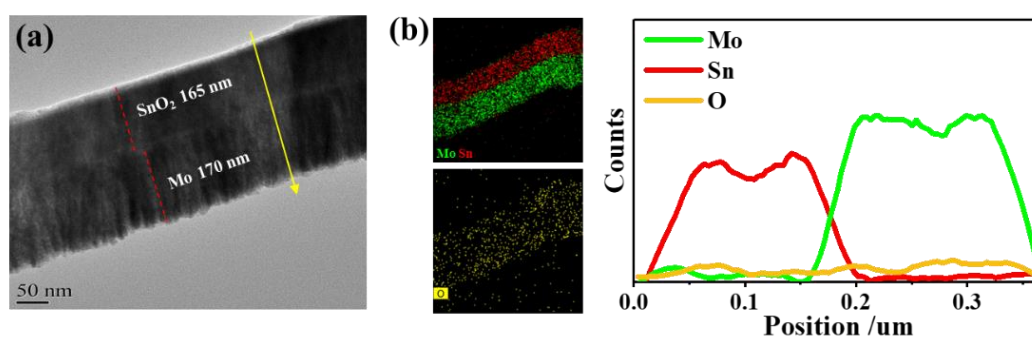

5  
6 **Figure S8.** TEM image of cross-sectional morphology (a) and EDS images (b) for  
7 SM electrode.

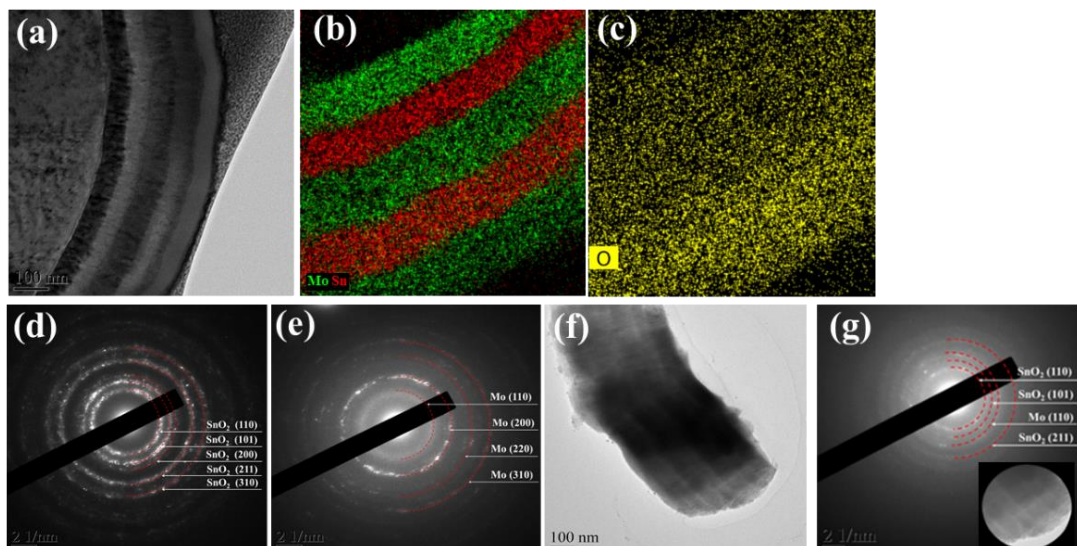

**Figure S9.** TEM images of cross-sectional morphology and phase observation for MSM-A (a-e) and MSM-B (f, g) electrodes. (a) Typical TEM image of cross-sectional morphology. (b, c) EDS mapping of Sn, Mo and O elements. (d) SAED image of SnO<sub>2</sub> layer. (e) SAED image of Mo layer. (f) TEM cross-sectional morphology image. (g) SAED image (insert image shows the selected part).

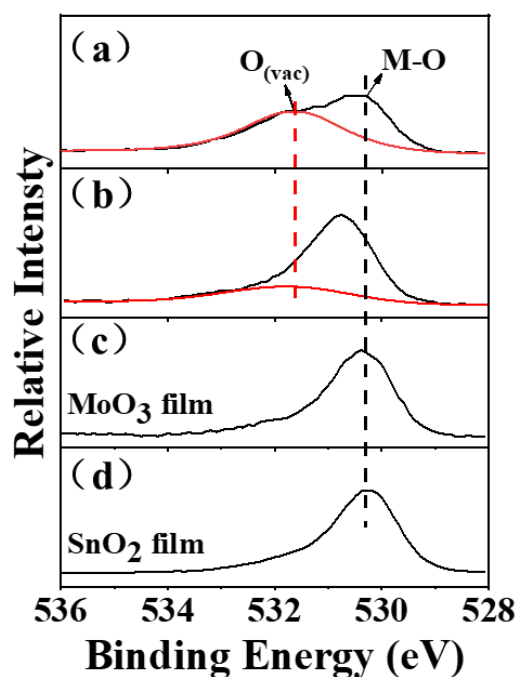

**Figure S10.** XPS spectra of O 1s. (a) at the up side of interface in MSM. (b) at the down side of interface in MSM. (c) MoO<sub>3</sub> film. (d) SnO<sub>2</sub> film.



1 down side of interface in MSM. (c) SnO<sub>2</sub> films. (d) MoO<sub>3</sub> films.

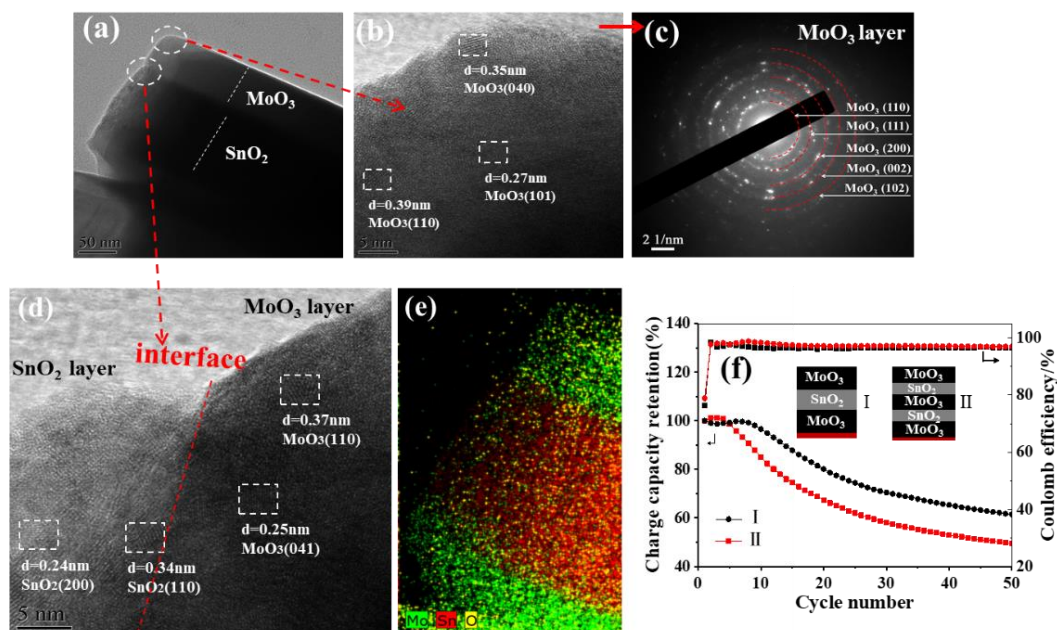

2  
3 **Figure S11.** (a-e) TEM observation for the MoO<sub>3</sub>/SnO<sub>2</sub>/MoO<sub>3</sub> electrode. (a) Typical  
4 cross-sectional morphology. (b) HRTEM image of the MoO<sub>3</sub> layer. (c) SAED image  
5 of the MoO<sub>3</sub> layer. (d) HRTEM image at the interface between MoO<sub>3</sub> and SnO<sub>2</sub> layers.  
6 (e) EDS mapping image of Sn, Mo and O elements. (f) Cycling performance of  
7 MoO<sub>3</sub>-SnO<sub>2</sub> electrodes.

8 The HRTEM and SAED images for MoO<sub>3</sub> layer demonstrate the polycrystalline  
9 state of MoO<sub>3</sub> (Figure S11b, c). From the locally magnified HRTEM image at the  
10 interface between MoO<sub>3</sub> and SnO<sub>2</sub> layer (Figure S11d), obvious lattice fringes for MoO<sub>3</sub>  
11 and SnO<sub>2</sub> can be observed, indicating high crystallinity, which is significantly different  
12 from the amorphous interfaces in the MSM. Figure S11f displays the cycling  
13 performance of MoO<sub>3</sub>/SnO<sub>2</sub>/MoO<sub>3</sub> and MoO<sub>3</sub>/SnO<sub>2</sub>/MoO<sub>3</sub>/SnO<sub>2</sub>/MoO<sub>3</sub> electrodes.  
14 After 50 cycles, the MoO<sub>3</sub>/SnO<sub>2</sub>/MoO<sub>3</sub> achieves a charge capacity retention of 61.4 %,   
15 much lower than that of the MSM. Furthermore, the charge capacity retention further

- 1 decreased to 49.5 % for the  $\text{MoO}_3/\text{SnO}_2/\text{MoO}_3/\text{SnO}_2/\text{MoO}_3$  with greater interfacial
- 2 density, showing the negative effects of the interface in the  $\text{MoO}_3\text{-SnO}_2$  electrodes.

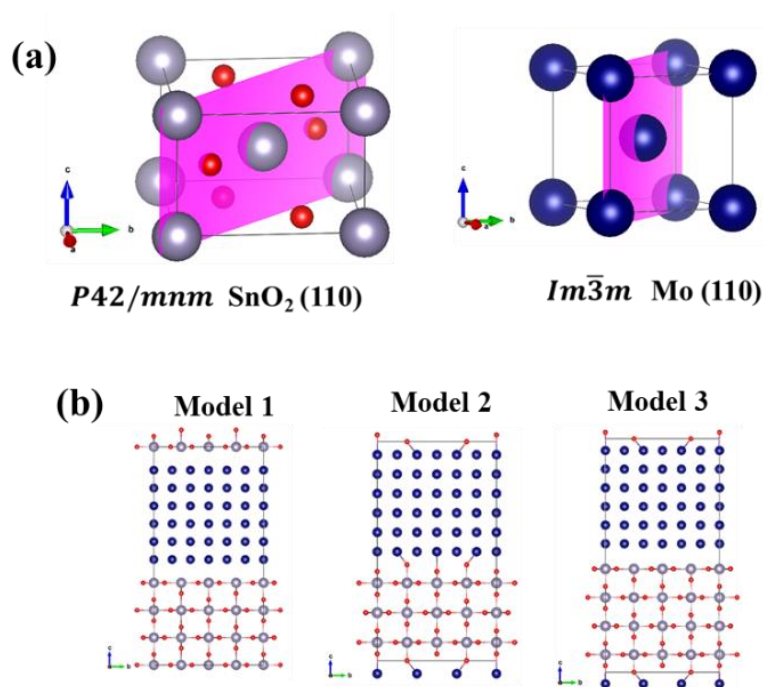

- 3
- 4 **Figure S12.** (a) Crystal structures of  $\text{SnO}_2$  and Mo viewed along the [001] direction.
- 5 (b) Three  $\text{SnO}_2/\text{Mo}$  interface models.
- 6

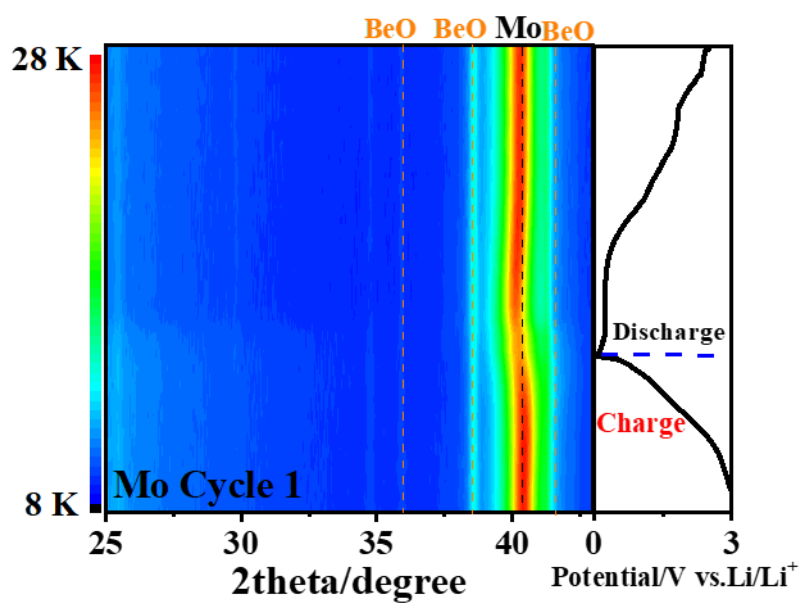

- 7
- 8 **Figure S13.** In-situ XRD phase evolution of Mo during lithiation/delithiation



1 processes.

2 For the pure Mo film shown in Figure S13, no additional phases or impurities are  
 3 presented throughout the initial cycle due to the inactivity of Mo to  $\text{Li}^+$ . However, the  
 4 diffraction peak of Mo slightly weakens and shifts to the lower  $2\theta$  values when  
 5 discharging to low potential, while increases and shifts to the higher  $2\theta$  values again  
 6 when charging. The variation of the Mo diffraction peak reflects the existence of  
 7 interaction between Mo layers and the electrolyte due to that Mo allows the solid  
 8 electrolyte interface (SEI) to form directly on its surface.<sup>1</sup>

9

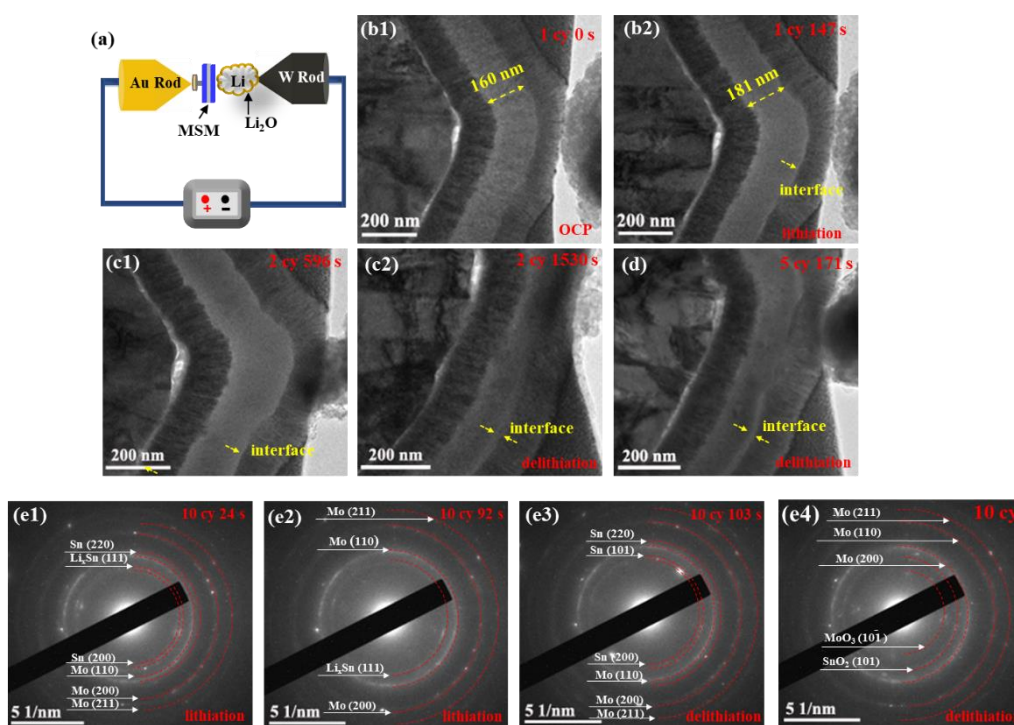

10

11 **Figure S14.** In-situ TEM observation of morphology and phase evolution of MSM  
 12 electrode during lithiation/delithiation process. (a) Schematic illustration of in situ TEM  
 13 measurement. (b-d) Sequential images of  $\text{Li}^+$  insertion/extraction in the 1st cycle (b),  
 14 2nd cycle (c), 5th cycle (d). (e) In situ SAED images operated at various states during  
 15 the 10th cycle.

As illustrated in Figure S14a, the metallic Li@Li<sub>2</sub>O and the MSM film are fixed on the W and Au tips, acting as the counter electrode and working electrode, respectively. During the 1st lithiation process, slight thickness increase about 13 % of SnO<sub>2</sub> layer is observed (Figure S14b1, b2), indicating the occurrence of rapid Li<sup>+</sup> insertion (Video S1). Compared with the previous reported results of fully lithiated SnO<sub>2</sub> with 370 % volume expansion,<sup>2, 3</sup> the minor volume variation confirms that the volume effect can be effectively prevented in the MSM. After the 1st full delithiation (Figure 6f), the thickness of SnO<sub>2</sub> layer demonstrates a volume shrinkage. Furthermore, during the following several rapid lithiation/delithiation processes (Figure S14c, d and Figure 6g), the MSM remains high structure integrity guaranteed by the protection of Mo layers and the coordination effect of the amorphous interfaces composed of mixed metal oxides with stabilization effect,<sup>4</sup> which is completely different from the pure SnO<sub>2</sub> electrode (Video S2)

The interfacial effect on the reversibility of electrochemical reactions was also investigated through the in-situ SAED patterns during the 10th cycle, and the demonstrated phase evolution is consistent with the in-situ XRD results. Figure S14e and Video S1 display the in-situ SAED patterns during the 10th cycle. In the early process of lithiation (Figure S14e1), the diffraction pattern is mainly composed of Mo, Sn, accompanied by a small amount of Li<sub>x</sub>Sn, corresponding to the conversion reaction of SnO<sub>2</sub>. Then, the disappearance of Sn and the increase of Li<sub>x</sub>Sn reveal the occurrence of an alloying reaction (Figure S14e2). In the delithiation process, the dealloying

1 reaction first happens with the diffraction rings of Sn (Figure S14e3), In the fully  
 2 delithiated status (Figure S14e4), the disappearance of Sn phase again indicates the  
 3 completion of reversed conversion reaction. Furthermore, the emergence of metal  
 4 oxides ( $\text{SnO}_2$ ,  $\text{MoO}_3$ ) demonstrates superior reaction reversibility as the cycle  
 5 proceeds.<sup>5</sup> These also clearly confirm that  $\text{SnO}_2$  is the dominant reactant in these  $\text{SnO}_2$ -  
 6 Mo multilayers.

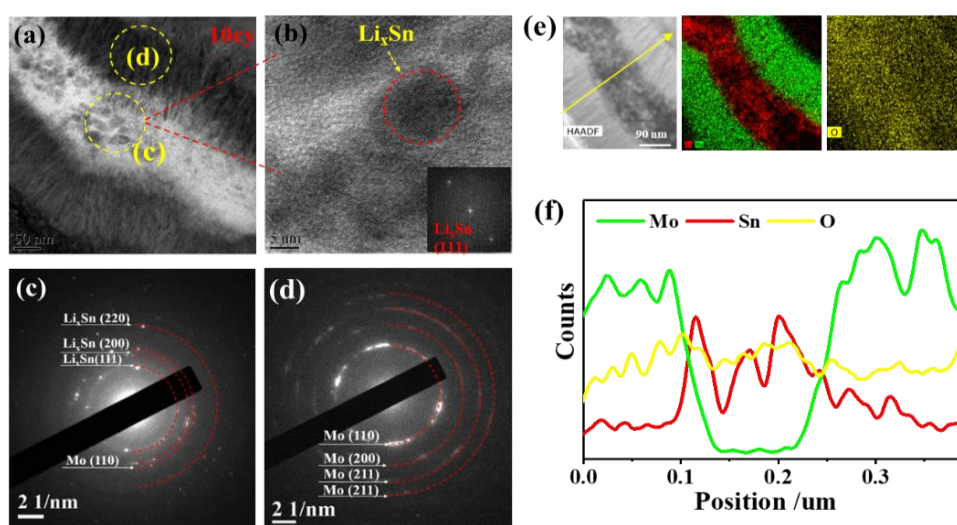

8 **Figure S15.** In-situ TEM observation of morphology and phase evolution of MSM  
 9 electrode at the fully lithiated status in the 10th cycle. (a) Typical cross-sectional  
 10 morphology. (b) HRTEM image of the  $\text{SnO}_2$  layer. (c, d) SAED images of the  $\text{SnO}_2$  and  
 11 Mo layers as marked in (a). (e, f) HAADF image, EDS mapping and line-scan images.

13 Figure S15 shows in-situ TEM observation for the MSM electrode at the fully  
 14 lithiated state after 10 cycles. Obviously, the  $\text{Li}_x\text{Sn}$  particles with a size of 5-10 nm have  
 15 been generated (Figures S15a-d). More apparent interdiffusion between  $\text{SnO}_2$  and Mo  
 16 layers happens as the cycles increase, and O tends to concentrate at the interfaces

(Figure S15e, f). As a result, the interfaces tend to capture more  $\text{Li}^+$  during discharge and contribute more additional capacity to the multilayers electrodes. More importantly, the concentration of O at the  $\text{SnO}_2/\text{Mo}$  interfaces would induce an increase of oxygen vacancy in the  $\text{SnO}_2$  layer, which promotes the reversibility of conversion reactions in lithiated  $\text{SnO}_2$ .<sup>2</sup>

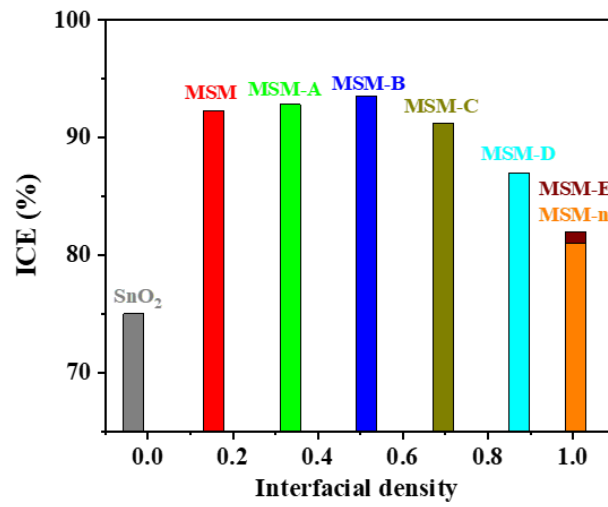

**Figure S16.** Comparison of the ICEs for  $\text{SnO}_2$ , MSM, MSM-A, MSM-B, MSM-C, MSM-D, MSM-E and MSM-n electrodes.

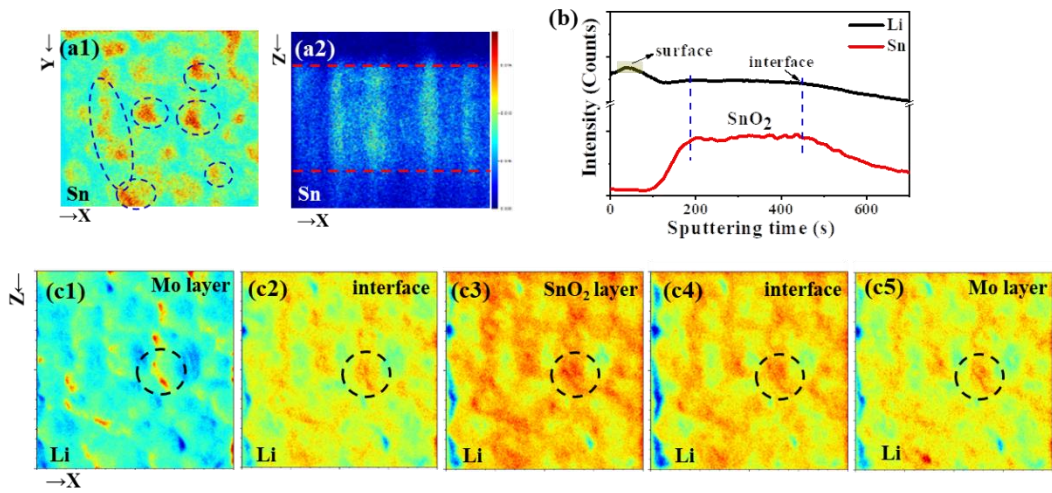

**Figure S17.** TOF-SIMS for MSM electrode as discharged to 0.01V in 1st cycle after the scavenging process, showing the distribution of Li. (a) Li distributed along the XY plane (a1) and XZ plane (a2). (b) Depth profiles of Li. (c) Distribution of Li with increasing depth along the XY plane. The depth positions are taken from (b).

In the fully lithiated state (discharged to 0.01V), after a scavenging process, as displayed in Figure S17a, b, Sn is mainly distributed in the middle layer and slightly diffuses to the Mo layers. The content of Li in MSM electrode as discharged to 0.01V in 1st cycle, as displayed in Figure S17b, c, in SnO<sub>2</sub> layer is the highest, followed by the interfaces, and the Mo layer is the lowest. It should be mentioned that the exceptionally high Li content on the surface results from the SEI and is not discussed further.

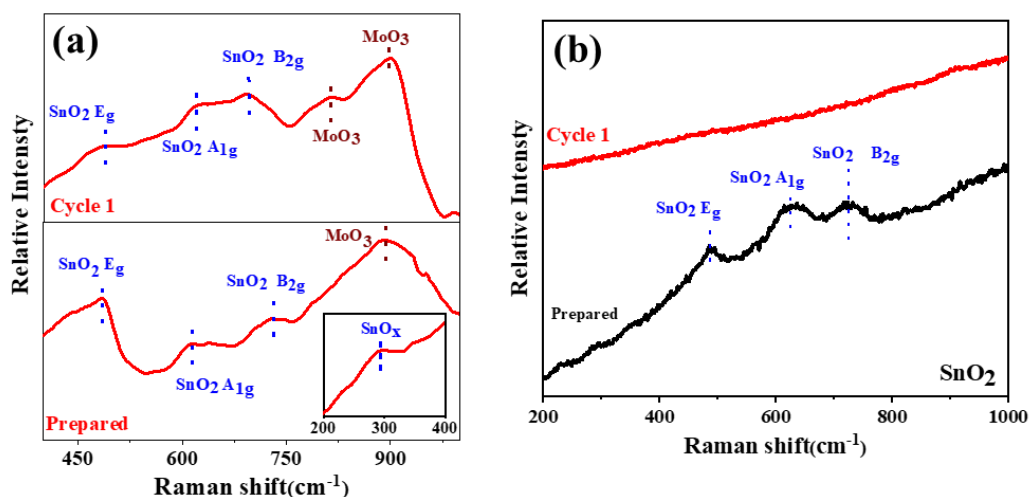

**Figure S18.** SERS spectra of SnO<sub>2</sub> electrode before and after the 1st cycle.

As displayed in Figure S18a, the pristine MSM shows three obvious bands for the SnO<sub>2</sub> phase at Raman shift around 480, 630, 720 cm<sup>-1</sup>, corresponding to the E<sub>g</sub>

(translational),  $A_{1g}$  (symmetric Sn-O stretching), and  $B_{2g}$  (asymmetric Sn-O stretching) vibration mode, respectively.<sup>6, 7</sup> Besides, the  $SnO_x$  peak at  $290\text{ cm}^{-1}$  and  $MoO_3$  peak at  $890\text{ cm}^{-1}$  are observed, which come from the interfaces between  $SnO_2$  and Mo layer. The SERS recorded at the end of first charge presents the same peaks of  $SnO_2$ , providing the strongest evidence to support that the conversion between  $Li_2O$  and  $SnO_2$  is reversible during the discharge/charge cycle of MSM. In contrast, no vibration of  $SnO_2$  can be detected in the pure  $SnO_2$  electrode after the initial cycle (Figure S18b).

**Table S1.** Preparation conditions and parameters of the various  $SnO_2$ -Mo multilayers.

| Film                                                                                         |         | Time (min)                                                     | Power | Pressur |
|----------------------------------------------------------------------------------------------|---------|----------------------------------------------------------------|-------|---------|
| $SnO_2$                                                                                      | $SnO_2$ | 3                                                              |       |         |
| Mo/ $SnO_2$                                                                                  | MS      | 3/3                                                            |       |         |
| $SnO_2$ /Mo                                                                                  | SM      | 3/3                                                            |       |         |
| Mo/ $SnO_2$ /Mo                                                                              | MSM     | 3/3/3                                                          |       |         |
| Mo/ $SnO_2$ /Mo/ $SnO_2$ /Mo (5 layers)                                                      | MSM-A   | 2/1.5/2/1.5/2                                                  | 120 W | 2 Pa    |
| Mo/ $SnO_2$ /Mo/ $SnO_2$ /Mo/ $SnO_2$ /Mo (7 layers)                                         | MSM-B   | 1.5/1/1.5/1/1.5/1/1.5                                          |       |         |
| Mo/ $SnO_2$ /Mo/ $SnO_2$ /Mo/ $SnO_2$ /Mo/ $SnO_2$ /Mo (9 layers)                            | MSM-C   | 1.2/0.75/1.2/0.75/1.2/0.75/1.2/0.75/1.2                        |       |         |
| Mo/ $SnO_2$ /Mo/ $SnO_2$ /Mo/ $SnO_2$ /Mo/ $SnO_2$ /Mo/ $SnO_2$ /Mo (11 layers)              | MSM-D   | 1/0.6/1/0.6/1/0.6/1/0.6/1/0.6/1                                |       |         |
| Mo/ $SnO_2$ /Mo/ $SnO_2$ /Mo/ $SnO_2$ /Mo/ $SnO_2$ /Mo/ $SnO_2$ /Mo/ $SnO_2$ /Mo (13 layers) | MSM-E   | 0.86/0.5/0.86/0.5/0.86/0.5/0.86/0.5/0.86/0.5/0.86/0.5/0.86/0.5 |       |         |
| Mo/ $SnO_2$ /...../ $SnO_2$ /Mo (n layers)                                                   | MSM-n   | Semi-cosputtering                                              |       |         |



Mo/SnO<sub>2</sub>/Mo/SnO<sub>2</sub>/Mo (5 layers)

MSM/5

3/3/3/3/3/3/3/3

Mo/SnO<sub>2</sub>/Mo/SnO<sub>2</sub>/Mo/SnO<sub>2</sub>/Mo/SnO<sub>2</sub>/Mo/SnO<sub>2</sub>/Mo (11 layers)

MSM/11

3/3/3/3/3/3/3/3/3/3/3

---

1

2

**Table S2.** Preparation conditions and parameters of the SnO<sub>2</sub>-MoO<sub>3</sub> film electrodes

| Film                                                                                     |    | Time              | Power | Pressure |
|------------------------------------------------------------------------------------------|----|-------------------|-------|----------|
| MoO <sub>3</sub> /SnO <sub>2</sub> /MoO <sub>3</sub>                                     | I  | 12/3/12 min       | 120W  | 2 pa     |
| MoO <sub>3</sub> /SnO <sub>2</sub> /MoO <sub>3</sub> /SnO <sub>2</sub> /MoO <sub>3</sub> | II | 8/1.5/8/1.5/8 min |       |          |

$$\gamma_{Sn_xO_y/Mo} = \frac{E_{Sn_xO_2/Mo} - E_{Sn_xO_y} - E_{Mo}}{2A}$$

**Table S3.** Interfacial formation energy of the three SnO<sub>2</sub>/Mo interface models.

| Model | $\Gamma_{Sn_xO_y/Mo}$ (eV/Å <sup>2</sup> ) |
|-------|--------------------------------------------|
| 1     | -0.078                                     |
| 2     | -0.367                                     |
| 3     | -0.209                                     |

**Table S4.** Atomic valence and valence charge for the elements of Mo and Sn at the interface of MSM electrode.

|                  | Mo   | Mo <sup>1+</sup> | Mo <sup>4+</sup> | Mo <sup>6+</sup> |
|------------------|------|------------------|------------------|------------------|
| Bader charge (e) | 6.00 | 5.46             | 4.10             | 3.64             |
|                  | Sn   | Sn <sup>2+</sup> | Sn <sup>4+</sup> |                  |
| Bader charge (e) | 4.00 | 2.80             | 1.69             |                  |

## References

1. Son, S. B. et al. An artificial interphase enables reversible magnesium chemistry in carbonate electrolytes. *Nat. Chem.* **10**, 532-539 (2018).
2. Hu, R. et al. Inhibiting grain coarsening and inducing oxygen vacancies: the roles of Mn in achieving a highly reversible conversion reaction and a long life SnO<sub>2</sub>-Mn-graphite ternary anode. *Energy Environ. Sci.* **10**, 2017-2029 (2017).
3. Wang, C. S., Appleby, A. J. & Little, F. E. Electrochemical study on nano-Sn, Li<sub>4.4</sub>Sn and AlSi<sub>0.1</sub> powders used as secondary lithium battery anodes. *J. Power Sources.* **93**, 174-185 (2001).
4. Sarkar, A. et al. High entropy oxides for reversible energy storage. *Nat. Commun.* **9**, 3400 (2018).
5. Hu, R. et al. Dramatically enhanced reversibility of Li<sub>2</sub>O in SnO<sub>2</sub>-based electrodes: the effect of nanostructure on high initial reversible capacity. *Energy Environ. Sci.* **9**, 595-603 (2016).
6. Ma, H. C. et al. Synthesis of visible-light responsive Sn-SnO<sub>2</sub>/C photocatalyst by simple carbothermal reduction. *Energy Environ. Sci.* **4**, 3067-3074 (2011).
7. Meduri, P., Clark, E., Dayalan, E., Sumanasekera, G. U. & Sunkara, M. K. Kinetically limited de-lithiation behavior of nanoscale tin-covered tin oxide nanowires. *Energy Environ. Sci.* **4**, 1695-1699 (2011).
